# Supplementary material
Source: PubMed Central journal article supplement (PMC1166611)

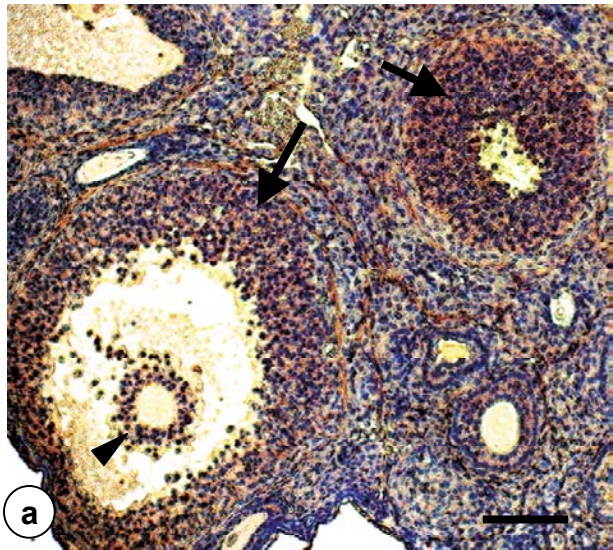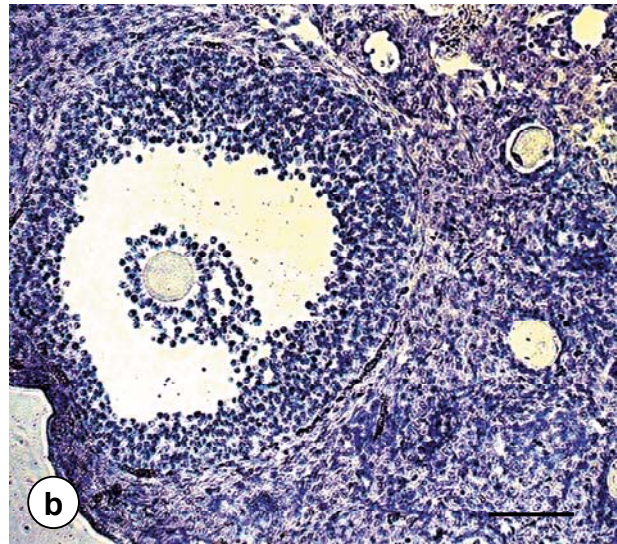

Supplement: pnas_0502442102_1.pdf [file pnas_0502442102_1.pdf]
